# Supplementary material
Source: PubMed Central journal article supplement (PMC4223920)
Supplement: rsif20140951supp1.pdf [file rsif20140951supp1.pdf]

**Supplementary text 1:** The data sets used to construct the dominance networks of *R. marginata*.

For each colony, the interacting individuals are labeled with numbers starting from 0 to  $n-1$  where  $n$  is the total number of interacting individuals. In each row, the ' $i j$ ' indicates that the individual  $i$  is dominating over the individual  $j$ .

Colony: V213

|    |    |
|----|----|
| 0  | 1  |
| 0  | 2  |
| 1  | 13 |
| 1  | 14 |
| 1  | 17 |
| 2  | 22 |
| 2  | 24 |
| 3  | 4  |
| 4  | 5  |
| 4  | 18 |
| 4  | 35 |
| 5  | 6  |
| 6  | 16 |
| 6  | 42 |
| 7  | 0  |
| 7  | 4  |
| 7  | 5  |
| 7  | 8  |
| 9  | 1  |
| 9  | 10 |
| 9  | 11 |
| 9  | 12 |
| 9  | 13 |
| 10 | 19 |
| 11 | 15 |
| 11 | 29 |
| 12 | 16 |
| 12 | 39 |
| 14 | 15 |
| 14 | 16 |
| 15 | 18 |
| 17 | 11 |
| 18 | 3  |
| 19 | 2  |
| 20 | 11 |
| 21 | 0  |
| 21 | 1  |
| 21 | 2  |
| 21 | 5  |
| 21 | 7  |
| 21 | 14 |

|    |    |
|----|----|
| 21 | 22 |
| 22 | 14 |
| 22 | 30 |
| 23 | 17 |
| 24 | 17 |
| 24 | 20 |
| 25 | 26 |
| 25 | 27 |
| 28 | 29 |
| 28 | 30 |
| 28 | 31 |
| 28 | 32 |
| 32 | 30 |
| 32 | 40 |
| 33 | 1  |
| 34 | 11 |
| 36 | 17 |
| 36 | 21 |
| 36 | 22 |
| 36 | 35 |
| 36 | 37 |
| 36 | 38 |
| 41 | 35 |

Colony: V215

|    |    |
|----|----|
| 0  | 1  |
| 0  | 2  |
| 3  | 4  |
| 3  | 5  |
| 6  | 2  |
| 6  | 7  |
| 7  | 2  |
| 8  | 0  |
| 9  | 10 |
| 11 | 12 |
| 11 | 13 |
| 12 | 6  |
| 12 | 10 |
| 12 | 13 |
| 12 | 15 |
| 12 | 17 |
| 12 | 19 |
| 12 | 20 |
| 13 | 0  |
| 13 | 16 |
| 14 | 12 |
| 14 | 13 |
| 14 | 15 |

|    |    |
|----|----|
| 16 | 2  |
| 17 | 13 |
| 17 | 14 |
| 17 | 18 |

Colony: V217

|    |    |
|----|----|
| 0  | 1  |
| 0  | 2  |
| 0  | 3  |
| 4  | 5  |
| 6  | 0  |
| 7  | 8  |
| 8  | 3  |
| 8  | 22 |
| 9  | 10 |
| 10 | 1  |
| 10 | 13 |
| 10 | 15 |
| 10 | 16 |
| 10 | 17 |
| 11 | 12 |
| 11 | 13 |
| 14 | 3  |
| 14 | 5  |
| 17 | 3  |
| 17 | 27 |
| 17 | 28 |
| 18 | 9  |
| 18 | 19 |
| 20 | 10 |
| 20 | 18 |
| 20 | 21 |
| 21 | 23 |
| 23 | 24 |
| 25 | 14 |
| 26 | 3  |
| 27 | 8  |
| 27 | 23 |

Colony: 219

|   |   |
|---|---|
| 0 | 1 |
| 0 | 2 |
| 0 | 3 |
| 1 | 3 |
| 2 | 1 |
| 3 | 5 |
| 3 | 7 |

|    |    |
|----|----|
| 3  | 11 |
| 4  | 5  |
| 5  | 6  |
| 5  | 7  |
| 8  | 2  |
| 8  | 9  |
| 9  | 1  |
| 10 | 1  |
| 12 | 1  |
| 12 | 2  |
| 12 | 3  |
| 12 | 8  |
| 12 | 9  |
| 12 | 10 |
| 12 | 13 |

Colony: V220

|    |   |
|----|---|
| 0  | 1 |
| 2  | 3 |
| 4  | 5 |
| 4  | 6 |
| 7  | 1 |
| 8  | 1 |
| 8  | 5 |
| 8  | 9 |
| 10 | 0 |
| 11 | 1 |
| 12 | 1 |
| 12 | 3 |
| 12 | 4 |
| 12 | 5 |
| 12 | 7 |
| 13 | 5 |
| 13 | 8 |
| 14 | 2 |
| 14 | 6 |

Colony: V221

|   |   |
|---|---|
| 0 | 1 |
| 0 | 2 |
| 1 | 8 |
| 3 | 4 |
| 5 | 1 |
| 6 | 0 |
| 7 | 4 |
| 7 | 8 |
| 9 | 0 |

|    |    |
|----|----|
| 9  | 3  |
| 9  | 4  |
| 9  | 8  |
| 9  | 10 |
| 9  | 11 |
| 12 | 1  |
| 12 | 8  |
| 13 | 0  |
| 13 | 1  |

Colony: V222

|    |    |
|----|----|
| 0  | 1  |
| 0  | 2  |
| 1  | 6  |
| 1  | 7  |
| 1  | 8  |
| 2  | 13 |
| 2  | 14 |
| 3  | 4  |
| 3  | 5  |
| 4  | 5  |
| 5  | 1  |
| 5  | 11 |
| 5  | 13 |
| 6  | 8  |
| 8  | 14 |
| 9  | 5  |
| 9  | 6  |
| 10 | 0  |
| 10 | 1  |
| 10 | 6  |
| 10 | 11 |
| 10 | 12 |
| 12 | 0  |
| 15 | 13 |
| 15 | 14 |
| 16 | 1  |
| 16 | 2  |
| 16 | 3  |
| 16 | 4  |
| 16 | 5  |
| 16 | 6  |
| 16 | 7  |
| 16 | 8  |
| 16 | 9  |
| 16 | 10 |
| 16 | 11 |
| 16 | 12 |

|    |    |
|----|----|
| 16 | 14 |
| 16 | 17 |
| 16 | 18 |
| 19 | 10 |

Colony: V223

|    |    |
|----|----|
| 0  | 1  |
| 1  | 7  |
| 1  | 11 |
| 2  | 1  |
| 2  | 3  |
| 3  | 0  |
| 3  | 1  |
| 3  | 8  |
| 3  | 15 |
| 4  | 5  |
| 6  | 1  |
| 6  | 7  |
| 8  | 5  |
| 9  | 3  |
| 9  | 6  |
| 9  | 10 |
| 10 | 0  |
| 10 | 3  |
| 12 | 0  |
| 12 | 1  |
| 12 | 10 |
| 12 | 13 |
| 12 | 14 |
| 16 | 0  |
| 16 | 10 |
| 16 | 12 |

Colony: V224

|   |    |
|---|----|
| 0 | 1  |
| 1 | 7  |
| 1 | 10 |
| 1 | 11 |
| 1 | 12 |
| 2 | 3  |
| 4 | 0  |
| 4 | 5  |
| 4 | 6  |
| 5 | 7  |
| 6 | 0  |
| 6 | 1  |
| 7 | 12 |

|    |   |
|----|---|
| 8  | 0 |
| 8  | 1 |
| 8  | 3 |
| 8  | 4 |
| 8  | 5 |
| 8  | 6 |
| 8  | 7 |
| 9  | 0 |
| 9  | 1 |
| 13 | 6 |
