# Supplementary material
Source: PubMed Central journal article supplement (PMC4223920)

**Supplementary text 2:** Measure of the resampling profiles for the dominance networks in 9 colonies of *R. marginata*. The number of connected nodes (circles) and the number of observed links (cross) are plotted against the timespan in hours over which the colonies were observed.

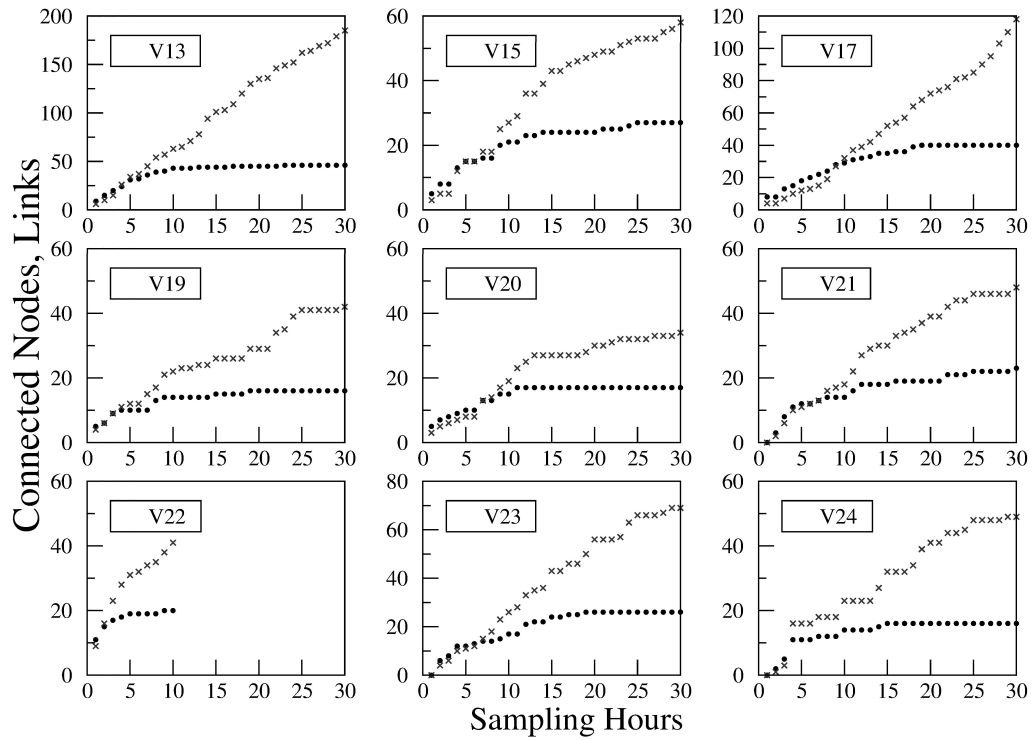

Supplement: rsif20140951supp2.pdf [file rsif20140951supp2.pdf]
