# Supplementary material
Source: PubMed Central journal article supplement (PMC4223920)
Supplement: rsif20140951supp3.pdf [file rsif20140951supp3.pdf]

**Supplementary text 3:** Frequencies of the triads and their significance in networks constructed from dominance interactions in 8 different colonies of *R. marginata*.

Sampled by 20 hours of observation

| Triad identity | Observed frequency (%) |      | Observed in networks | Significant in networks (count>1, $P<0.1$ ) | Less significant in networks (count>1, $P>0.9$ ) |
|----------------|------------------------|------|----------------------|---------------------------------------------|--------------------------------------------------|
|                | mean                   | sd   |                      |                                             |                                                  |
| 1              | 33.43                  | 8.54 | 8                    | 0                                           | 3                                                |
| 2              | 18.96                  | 8.93 | 8                    | 0                                           | 4                                                |
| 3              | 31.19                  | 8.91 | 8                    | 2                                           | 0                                                |
| 4              | 0.88                   | 1.04 | 4                    | 1                                           | 1                                                |
| 5              | 2.78                   | 4.67 | 4                    | 0                                           | 0                                                |
| 6              | 0.08                   | 0.18 | 2                    | 0                                           | 0                                                |
| 7              | 10.70                  | 5.67 | 8                    | 4                                           | 0                                                |
| 8              | 0.60                   | 0.78 | 5                    | 0                                           | 0                                                |
| 9              | 0.40                   | 0.88 | 3                    | 1                                           | 0                                                |
| 10             | 0.48                   | 0.61 | 4                    | 0                                           | 0                                                |
| 11             | 0.36                   | 0.71 | 3                    | 0                                           | 0                                                |
| 12             | 0.14                   | 0.36 | 2                    | 0                                           | 0                                                |
| 13             | 0.00                   | 0.00 | 0                    | 0                                           | 0                                                |

Sampled by 30 hours of observation

| Triad identity | Observed frequency (%) |      | Observed in networks | Significant in networks (count>1, $P<0.1$ ) | Less significant in networks (count>1, $P>0.9$ ) |
|----------------|------------------------|------|----------------------|---------------------------------------------|--------------------------------------------------|
|                | mean                   | sd   |                      |                                             |                                                  |
| 1              | 30.27                  | 7.15 | 8                    | 0                                           | 3                                                |
| 2              | 19.34                  | 7.04 | 8                    | 0                                           | 4                                                |
| 3              | 30.47                  | 6.49 | 8                    | 1                                           | 1                                                |
| 4              | 1.04                   | 1.10 | 5                    | 1                                           | 1                                                |
| 5              | 2.97                   | 4.25 | 5                    | 0                                           | 1                                                |
| 6              | 0.09                   | 0.18 | 2                    | 0                                           | 0                                                |
| 7              | 13.25                  | 7.16 | 8                    | 5                                           | 0                                                |
| 8              | 1.06                   | 0.94 | 6                    | 1                                           | 1                                                |
| 9              | 0.35                   | 0.61 | 4                    | 1                                           | 0                                                |
| 10             | 0.60                   | 0.70 | 4                    | 2                                           | 0                                                |
| 11             | 0.45                   | 0.63 | 4                    | 1                                           | 0                                                |
| 12             | 0.11                   | 0.25 | 3                    | 0                                           | 0                                                |
| 13             | 0.00                   | 0.00 | 0                    | 0                                           | 0                                                |
