# Supplementary material
Source: PubMed Central journal article supplement (PMC4223920)
Supplement: rsif20140951supp4.pdf [file rsif20140951supp4.pdf]

**Supplementary text 4:** Analysis of the link weights sampled by 10 hours of observations in 9 colonies of *R. maginata*.

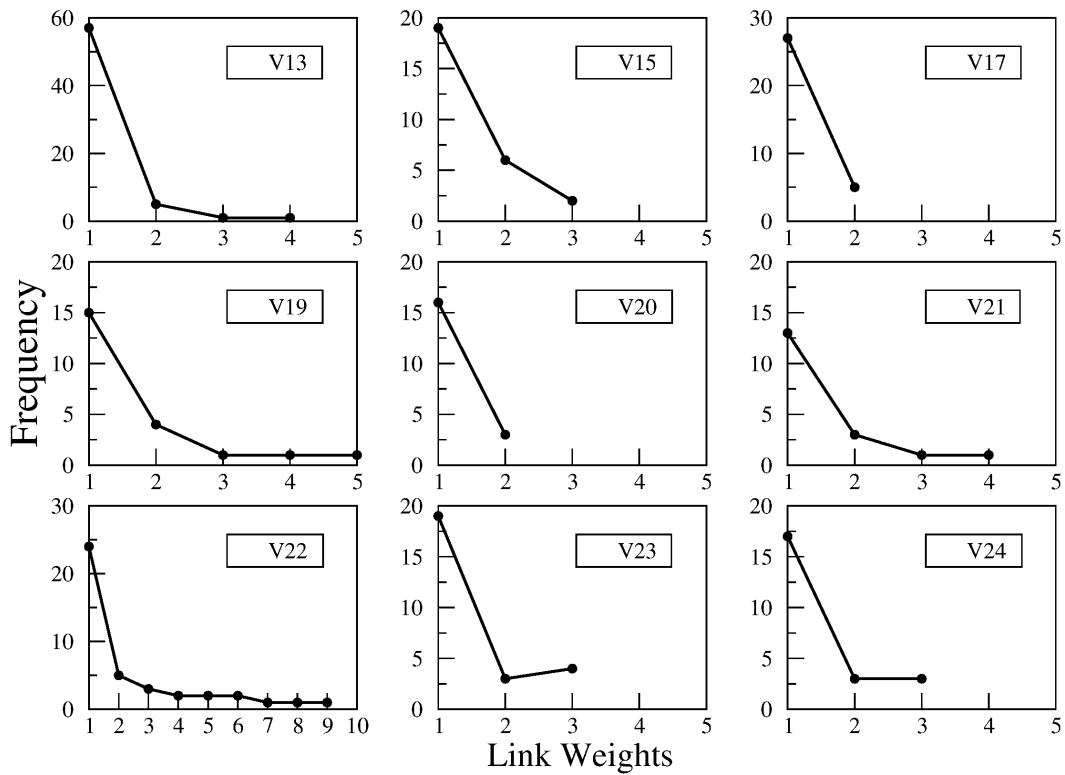

Link weight distributions for individual colonies

| Link weights | Observed frequencies (%) |      |
|--------------|--------------------------|------|
|              | mean                     | sd   |
| 1            | 74.88                    | 9.50 |
| 2            | 14.79                    | 4.20 |
| 3            | 6.09                     | 5.42 |
| 4            | 1.84                     | 2.43 |
| 5            | 1.05                     | 2.08 |
| 6            | 0.54                     | 1.63 |
| 7            | 0.27                     | 0.81 |
| 8            | 0.27                     | 0.81 |
| 9            | 0.27                     | 0.81 |

Observed frequencies considering all colonies together
