# Supplementary material
Source: PubMed Central journal article supplement (PMC4223920)
Supplement: rsif20140951supp5.pdf [file rsif20140951supp5.pdf]

**Supplementary text 5:** Frequencies of the triads and their significance in networks constructed from different paired interactions other than dominance, sampled by 10 hours of observation in 9 different colonies of *R. marginata*. Relative percentages of frequencies compared to all interactions for each of the behaviour are also provided in brackets.

Behaviour: Antennation (relative % of frequency:  $22.96 \pm 2.01$ )

| Triad identity | Observed frequency (%) |      | Observed in networks | Significant in networks (count>1, $P<0.1$ ) | Less significant in networks (count>1, $P>0.9$ ) |
|----------------|------------------------|------|----------------------|---------------------------------------------|--------------------------------------------------|
|                | mean                   | sd   |                      |                                             |                                                  |
| 1              | 27.50                  | 5.80 | 9                    | 0                                           | 1                                                |
| 2              | 16.37                  | 3.63 | 9                    | 0                                           | 1                                                |
| 3              | 29.00                  | 6.91 | 9                    | 1                                           | 3                                                |
| 4              | 4.99                   | 2.66 | 9                    | 0                                           | 0                                                |
| 5              | 9.95                   | 5.16 | 9                    | 2                                           | 0                                                |
| 6              | 2.02                   | 2.72 | 6                    | 1                                           | 0                                                |
| 7              | 5.72                   | 4.50 | 8                    | 1                                           | 0                                                |
| 8              | 0.88                   | 0.76 | 7                    | 2                                           | 0                                                |
| 9              | 0.78                   | 0.65 | 7                    | 2                                           | 0                                                |
| 10             | 1.12                   | 1.05 | 8                    | 0                                           | 1                                                |
| 11             | 1.15                   | 1.02 | 7                    | 2                                           | 0                                                |
| 12             | 0.52                   | 0.70 | 4                    | 0                                           | 0                                                |
| 13             | 0.00                   | 0.00 | 0                    | 0                                           | 0                                                |

Behaviour: Allogrooming (relative % of frequency:  $4.82 \pm 3.40$ )

| Triad identity | Observed frequency (%) |       | Observed in networks | Significant in networks (count>1, $P<0.1$ ) | Less significant in networks (count>1, $P>0.9$ ) |
|----------------|------------------------|-------|----------------------|---------------------------------------------|--------------------------------------------------|
|                | mean                   | sd    |                      |                                             |                                                  |
| 1              | 31.52                  | 19.79 | 8                    | 1                                           | 0                                                |
| 2              | 51.77                  | 25.69 | 9                    | 0                                           | 0                                                |
| 3              | 14.35                  | 13.26 | 8                    | 1                                           | 0                                                |
| 4              | 0                      | 0     | 0                    | 0                                           | 0                                                |
| 5              | 0                      | 0     | 0                    | 0                                           | 0                                                |
| 6              | 0                      | 0     | 0                    | 0                                           | 0                                                |
| 7              | 2.36                   | 4.09  | 3                    | 1                                           | 0                                                |
| 8              | 0                      | 0     | 0                    | 0                                           | 0                                                |
| 9              | 0                      | 0     | 0                    | 0                                           | 0                                                |
| 10             | 0                      | 0     | 0                    | 0                                           | 0                                                |
| 11             | 0                      | 0     | 0                    | 0                                           | 0                                                |
| 12             | 0                      | 0     | 0                    | 0                                           | 0                                                |
| 13             | 0                      | 0     | 0                    | 0                                           | 0                                                |

Behaviour: Solicit (relative % of frequency:  $50.41 \pm 7.46$ )

| Triad identity | Observed frequency (%) |      | Observed in networks | Significant in networks (count>1, $P<0.1$ ) | Less significant in networks (count>1, $P>0.9$ ) |
|----------------|------------------------|------|----------------------|---------------------------------------------|--------------------------------------------------|
|                | mean                   | sd   |                      |                                             |                                                  |
| 1              | 21.54                  | 7.35 | 9                    | 1                                           | 2                                                |
| 2              | 19.44                  | 6.88 | 9                    | 1                                           | 4                                                |
| 3              | 24.48                  | 7.54 | 9                    | 1                                           |                                                  |
| 4              | 6.67                   | 4.11 | 9                    | 2                                           | 1                                                |
| 5              | 6.74                   | 3.75 | 9                    | 1                                           | 2                                                |
| 6              | 1.28                   | 1.79 | 5                    |                                             |                                                  |
| 7              | 11.55                  | 5.71 | 9                    | 2                                           | 1                                                |
| 8              | 1.09                   | 0.38 | 9                    |                                             |                                                  |
| 9              | 1.32                   | 0.83 | 9                    | 2                                           | 1                                                |
| 10             | 2.25                   | 2.00 | 9                    | 3                                           |                                                  |
| 11             | 1.72                   | 1.60 | 9                    |                                             | 1                                                |
| 12             | 1.56                   | 1.53 | 8                    | 4                                           | 1                                                |
| 13             | 0.36                   | 0.74 | 4                    | 1                                           | 1                                                |

Behaviour: Food sharing (relative % of frequency:  $7.62 \pm 6.21$ )

| Triad identity | Observed frequency (%) |       | Observed in networks | Significant in networks (count>1, $P<0.1$ ) | Less significant in networks (count>1, $P>0.9$ ) |
|----------------|------------------------|-------|----------------------|---------------------------------------------|--------------------------------------------------|
|                | mean                   | sd    |                      |                                             |                                                  |
| 1              | 17.29                  | 7.26  | 7                    | 0                                           | 0                                                |
| 2              | 40.12                  | 13.02 | 8                    | 0                                           | 0                                                |
| 3              | 33.99                  | 7.01  | 8                    | 1                                           | 0                                                |
| 4              | 2.05                   | 2.99  | 3                    | 0                                           | 0                                                |
| 5              | 2.53                   | 4.62  | 3                    | 1                                           | 0                                                |
| 6              | 0.16                   | 0.44  | 1                    | 0                                           | 0                                                |
| 7              | 3.03                   | 2.79  | 6                    | 0                                           | 0                                                |
| 8              | 0.29                   | 0.54  | 2                    | 0                                           | 0                                                |
| 9              | 0.16                   | 0.44  | 1                    | 0                                           | 0                                                |
| 10             | 0.31                   | 0.57  | 2                    | 0                                           | 0                                                |
| 11             | 0.07                   | 0.21  | 1                    | 0                                           | 0                                                |
| 12             | 0.00                   | 0     | 0                    | 0                                           | 0                                                |
| 13             | 0.00                   | 0     | 0                    | 0                                           | 0                                                |
